# Supplementary figures and images for: Sex differences in cardiac fibrosis induced by gestational exposure to polystyrene nanoplastics in mice offspring
Source: Royal Society of Chemistry journal article supplement (doi:10.1039/d4em00642a), 2025-01-01

A

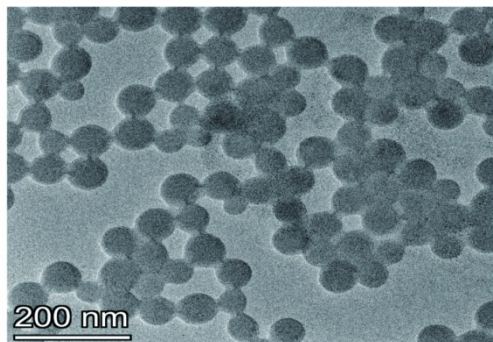

B

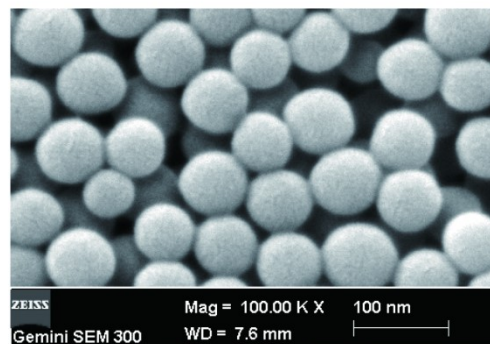

Supplementary data. Fig. 1 Electron microscope image of PS-NPs.

Supplement: d4em00642a1.pdf [file d4em00642a1.pdf]
